# Supplementary material for: Sarcopenia as Manifested by L3SMI Is Associated with Increased Long-Term Mortality amongst Internal Medicine Patients—A Prospective Cohort Study
Source: MDPI journal article supplement (doi:10.3390/jcm11123500), 2022-06-17
Supplement: s1 [file s1]

Supplementary Table S1- Correlation between L3SMI and different frailty measurements, per sex category.

A. Sex=Male

| Pearson Correlations                                         |                     |         |         |            |         |
|--------------------------------------------------------------|---------------------|---------|---------|------------|---------|
|                                                              |                     | L3SMI   | Age     | Hemoglobin | Albumin |
| L3SMI                                                        | Pearson Correlation | 1       | -.382** | .142       | .172    |
|                                                              | Sig. (2-tailed)     |         | .000    | .137       | .073    |
|                                                              | N                   | 111     | 111     | 111        | 110     |
| Age                                                          | Pearson Correlation | -.382** | 1       | -.248**    | -.011   |
|                                                              | Sig. (2-tailed)     | .000    |         | .009       | .913    |
|                                                              | N                   | 111     | 111     | 111        | 110     |
| Hemoglobin                                                   | Pearson Correlation | .142    | -.248** | 1          | .503**  |
|                                                              | Sig. (2-tailed)     | .137    | .009    |            | .000    |
|                                                              | N                   | 111     | 111     | 111        | 110     |
| Albumin                                                      | Pearson Correlation | .172    | -.011   | .503**     | 1       |
|                                                              | Sig. (2-tailed)     | .073    | .913    | .000       |         |
|                                                              | N                   | 110     | 110     | 110        | 110     |
| **. Correlation is significant at the 0.01 level (2-tailed). |                     |         |         |            |         |

|                |       |                         | L3SMI  | MAMC   | ALT   | Norton admission | Morse admission | FRAIL SCORE |
|----------------|-------|-------------------------|--------|--------|-------|------------------|-----------------|-------------|
| Spearman's Rho | L3SMI | Correlation Coefficient | 1.000  | .351** | -.025 | .254**           | -.268**         | -.149       |
|                |       | Sig. (2-tailed)         | .      | .000   | .791  | .007             | .004            | .119        |
|                |       | N                       | 111    | 111    | 111   | 111              | 111             | 111         |
|                | MAMC  | Correlation Coefficient | .351** | 1.000  | .071  | .250**           | -.190*          | -.157       |
|                |       | Sig. (2-tailed)         | .000   | .      | .457  | .008             | .046            | .100        |
|                |       | N                       | 111    | 111    | 111   | 111              | 111             | 111         |
|                | ALT   | Correlation Coefficient | -.025  | .071   | 1.000 | .298**           | -.231*          | -.085       |
|                |       | Sig. (2-tailed)         | .791   | .457   | .     | .002             | .015            | .374        |
|                |       | N                       | 111    | 111    | 111   | 111              | 111             | 111         |
|                |       | N                       | 17     | 17     | 17    | 17               | 17              | 17          |

|  |                  |                         |         |        |        |         |         |         |
|--|------------------|-------------------------|---------|--------|--------|---------|---------|---------|
|  | Norton admission | Correlation Coefficient | .254**  | .250** | .298** | 1.000   | -.605** | -.399** |
|  |                  | Sig. (2-tailed)         | .007    | .008   | .002   | .       | .000    | .000    |
|  |                  | N                       | 111     | 111    | 111    | 111     | 111     | 111     |
|  | Morse admission  | Correlation Coefficient | -.268** | -.190* | -.231* | -.605** | 1.000   | .347**  |
|  |                  | Sig. (2-tailed)         | .004    | .046   | .015   | .000    | .       | .000    |
|  |                  | N                       | 111     | 111    | 111    | 111     | 111     | 111     |
|  | FRAIL SCORE      | Correlation Coefficient | -.149   | -.157  | -.085  | -.399** | .347**  | 1.000   |
|  |                  | Sig. (2-tailed)         | .119    | .100   | .374   | .000    | .000    | .       |
|  |                  | N                       | 111     | 111    | 111    | 111     | 111     | 111     |

B. Sex=Female

| Pearson Correlations                                         |                     |       |         |            |         |
|--------------------------------------------------------------|---------------------|-------|---------|------------|---------|
|                                                              |                     | L3SMI | Age     | Hemoglobin | Albumin |
| L3SMI                                                        | Pearson Correlation | 1     | -.118   | -.072      | .058    |
|                                                              | Sig. (2-tailed)     |       | .309    | .534       | .632    |
|                                                              | N                   | 76    | 76      | 76         | 71      |
| Age                                                          | Pearson Correlation | -.118 | 1       | -.318**    | -.180   |
|                                                              | Sig. (2-tailed)     | .309  |         | .005       | .134    |
|                                                              | N                   | 76    | 76      | 76         | 71      |
| Hemoglobin                                                   | Pearson Correlation | -.072 | -.318** | 1          | .335**  |
|                                                              | Sig. (2-tailed)     | .534  | .005    |            | .004    |
|                                                              | N                   | 76    | 76      | 76         | 71      |
| Albumin                                                      | Pearson Correlation | .058  | -.180   | .335**     | 1       |
|                                                              | Sig. (2-tailed)     | .632  | .134    | .004       |         |
|                                                              | N                   | 71    | 71      | 71         | 71      |
| **. Correlation is significant at the 0.01 level (2-tailed). |                     |       |         |            |         |
| a. Gender = 1                                                |                     |       |         |            |         |

|                |                  |                         | L3SMI | MAMC  | ALT   | Norton admission | Morse admission | FRAIL SCORE |
|----------------|------------------|-------------------------|-------|-------|-------|------------------|-----------------|-------------|
| Spearman's rho | L3SMI            | Correlation Coefficient | 1.000 | .224  | -.027 | -.045            | .093            | -.083       |
|                |                  | Sig. (2-tailed)         | .     | .051  | .821  | .697             | .425            | .478        |
|                |                  | N                       | 76    | 76    | 74    | 76               | 76              | 76          |
|                | MAMC             | Correlation Coefficient | .224  | 1.000 | -.033 | -.125            | .166            | .080        |
|                |                  | Sig. (2-tailed)         | .051  | .     | .780  | .281             | .151            | .492        |
|                |                  | N                       | 76    | 76    | 74    | 76               | 76              | 76          |
|                |                  | Sig. (2-tailed)         | .020  | .000  | .546  | .148             | .093            | .175        |
|                |                  | N                       | 75    | 75    | 73    | 75               | 75              | 75          |
|                | ALT              | Correlation Coefficient | -.027 | -.033 | 1.000 | -.080            | -.003           | -.169       |
|                |                  | Sig. (2-tailed)         | .821  | .780  | .     | .498             | .981            | .150        |
|                |                  | N                       | 74    | 74    | 74    | 74               | 74              | 74          |
|                | Norton admission | Correlation Coefficient | -.045 | -.125 | -.080 | 1.000            | -.609**         | -.157       |
|                |                  | Sig. (2-tailed)         | .697  | .281  | .498  | .                | .000            | .175        |
|                |                  | N                       | 76    | 76    | 74    | 76               | 76              | 76          |
|                | Morse admission  | Correlation Coefficient | .093  | .166  | -.003 | -.609**          | 1.000           | .117        |
|                |                  | Sig. (2-tailed)         | .425  | .151  | .981  | .000             | .               | .313        |
|                |                  | N                       | 76    | 76    | 74    | 76               | 76              | 76          |
|                | FRAIL SCORE      | Correlation Coefficient | -.083 | .080  | -.169 | -.157            | .117            | 1.000       |
|                |                  | Sig. (2-tailed)         | .478  | .492  | .150  | .175             | .313            | .           |
|                |                  | N                       | 76    | 76    | 74    | 76               | 76              | 76          |

Supplementary Table S2- BMI Specific cut-off values for Skeletal Muscle Index

|                        | One Year Survival |              | All Time Survival |              |
|------------------------|-------------------|--------------|-------------------|--------------|
|                        | HR (95%CI)        | P value      | HR (95%CI)        | P value      |
| BMI-Specific Low L3SMI | 1.91 (0.89-4.07)  | <b>0.096</b> | 2.47 (1.26-4.82)  | <b>0.008</b> |
